# Supplementary material for: Nutrient and biomass dynamics for dual-organ yield in turmeric (Curcuma longa L.)
Source: PeerJ. 2025 Aug 28;13:e19933. doi: 10.7717/peerj.19933 (PMC12399080; doi:10.7717/peerj.19933)
Supplement: Supplemental Information 1 [file peerj-13-19933-s001.xlsx]

## Sheet: Sheet1
Dry matter	Accumulation	g/plant
	Time	Leaf	sd	Stem	sd	Rhizome	sd	Fiber	sd	Tuber	sd	Plant	sd
	55d	2.41	0.09	1.555	0.095	0.78	0.02	0.255	0.025			5	0.14
	69d	3.56	0.25	2.12	0.111	1.03	0.0208333	0.485	0.0288095			7.2	0.410643
	83d	7.995	0.2975	4.105	0.195	2.36	0.06	1.265	0.015			15.73	0.5675
	111d	10.2	0.152667	5.17	0.398333	7.02	0.17	1.67	0.251667	0.435	0.025	24.5	0.997667
	125d	10.56	0.120357	10.805	0.335	13.545	0.0546667	2.415	0.025	2.45	0.1425	39.78	0.15181
	139d	8.145	0.532083	12.96	0.380833	20.475	0.456	3.275	0.0075	6.315	0.226667	51.17	0.22275
	167d	7.335	0.4605	12.02	0.491667	24.855	0.665333	2.735	0.1075	11.285	0.056	58.23	0.123333
	195d	6.515	0.165	9.605	0.255	27.14	0.14	2.52	0.06	14.025	0.175	59.81	0.165
	209d	5.815	0.315	8.5	0.34	27.025	0.475	2.525	0.025	14.7	0.3	58.57	0.175
N	Content	g/kg											Accumulation	g/plant											Distribution rate(%)											Distribution rate(%)
	Time	Leaf	sd	Stem	sd	Rhizome	sd	Fiber	sd	Tuber	sd		Time	Leaf	sd	Stem	sd	Rhizome	sd	Fiber	sd	Tuber	sd		Time	Leaf	Stem	Rhizome	Fiber	Tuber		Tuber	Fiber	Rhizome	Stem	Leaf
	55d	1.721	0.024	1.587	0.075	2.236	0.163	1.401	0.088				55d	41.459	0.65	24.571	1.156	17.468	1.369	3.578	0.112				55d	47.63	28.22	20.05	4.1				4.1	20.05	28.22	47.63
	69d	1.749	0.027	1.675	0.053	2.047	0.128	1.412	0.066				69d	62.236	3.903	35.638	2.362	20.993	0.329	6.858	0.108				69d	49.5	28.27	16.78	5.46				5.46	16.78	28.27	49.5
	83d	2.153	0.068	2.077	0.065	1.992	0.125	1.617	0.025				83d	172.131	5.398	85.266	4.011	47.008	2.948	20.451	0.962				83d	52.98	26.24	14.48	6.31				6.31	14.48	26.24	52.98
	111d	2.065	0.097	2.545	0.16	2.001	0.134	1.938	0.122	1.521	0.072		111d	210.611	9.906	131.571	5.142	140.61	2.205	32.579	2.554	6.619	0.208		111d	40.45	25.18	26.91	6.19	1.27		1.27	6.19	26.91	25.18	40.45
	125d	2.874	0.09	2.969	0.175	1.654	0.026	0.777	0.012	1.329	0.021		125d	303.587	23.8	320.054	18.254	223.983	17.559	18.774	1.177	32.481	1.528		125d	33.75	35.6	24.95	2.09	3.61		3.61	2.09	24.95	35.6	33.75
	139d	2.7	0.127	2.018	0.063	2.15	0.101	1.862	0.146	1.318	0.103		139d	220.413	17.279	261.53	16.201	440.101	20.701	60.928	2.866	83.211	5.219		139d	20.64	24.52	41.31	5.72	7.81		7.81	5.72	41.31	24.52	20.64
	167d	2.654	0.042	2.137	0.067	2.337	0.183	1.855	0.141	1.027	0.032		167d	194.471	3.049	256.919	16.113	580.88	36.43	50.696	3.974	115.842	1.816		167d	16.22	21.43	48.46	4.23	9.66		9.66	4.23	48.46	21.43	16.22
	195d	2.065	0.065	2.301	0.144	2.211	0.069	1.534	0.024	1.097	0.034		195d	134.365	10.533	221.23	13.875	599.754	28.21	38.705	3.034	153.872	7.238		195d	11.72	19.25	52.23	3.37	13.45		13.45	3.37	52.23	19.25	11.72
	209d	1.607	0.076	2.373	0.141	2.222	0.139	1.479	0.023	1.065	0.03		209d	93.258	2.924	201.725	11.814	599.957	37.627	37.368	2.929	156.458	9.812		209d	8.57	18.54	55.1	3.43	14.37		14.37	3.43	55.1	18.54	8.57
P	Content	g/kg											Accumulation	g/plant											Distribution rate(%)											Distribution rate(%)
	Time	Leaf	sd	Stem	sd	Rhizome	sd	Fiber	sd	Tuber	sd		Time	Leaf	sd	Stem	sd	Rhizome	sd	Fiber	sd	Tuber	sd		Time	Leaf	Stem	Rhizome	Fiber	Tuber		Tuber	Fiber	Rhizome	Stem	Leaf
	55d	0.521	0.033	0.608	0.029	0.65	0.041	0.503	0.039				55d	12.548	0.59	9.45	0.427	5.065	0.318	1.284	0.06				55d	44.27	33.3	17.89	4.55				4.55	17.89	33.3	44.27
	69d	0.471	0.022	0.57	0.036	0.536	0.034	0.438	0.027				69d	16.764	0.788	12.095	0.759	5.497	0.086	2.127	0.073				69d	45.89	33.18	15.1	5.83				5.83	15.1	33.18	45.89
	83d	0.671	0.011	0.656	0.021	0.494	0.031	0.594	0.028				83d	53.636	1.682	26.932	1.152	11.649	0.183	7.511	0.353				83d	53.78	26.99	11.69	7.54				7.54	11.69	26.99	53.78
	111d	0.497	0.027	0.667	0.042	0.606	0.037	0.582	0.032	0.7	0.022		111d	50.731	1.535	34.506	2.164	42.56	3.336	9.707	0.457	3.045	0.048		111d	36.15	24.51	30.31	6.87	2.16		2.16	6.87	30.31	24.51	36.15
	125d	0.669	0.01	0.657	0.041	0.702	0.055	0.574	0.036	0.617	0.039		125d	70.616	2.107	70.98	4.452	95.055	1.49	13.87	0.652	15.108	0.711		125d	26.59	26.72	35.79	5.22	5.69		5.69	5.22	35.79	26.72	26.59
	139d	0.758	0.036	0.575	0.009	0.548	0.043	0.644	0.054	0.683	0.031		139d	61.699	1.862	74.519	5.168	112.277	3.521	21.082	0.831	43.092	0.676		139d	19.73	23.83	35.92	6.74	13.79		13.79	6.74	35.92	23.83	19.73
	167d	0.661	0.01	0.779	0.049	0.711	0.045	0.784	0.061	0.503	0.024		167d	48.508	1.042	93.67	6.937	176.613	8.307	21.431	0.865	56.754	2.67		167d	12.22	23.59	44.5	5.4	14.3		14.3	5.4	44.5	23.59	12.22
	195d	0.552	0.009	0.604	0.038	0.71	0.052	0.416	0.013	0.244	0.004		195d	35.948	0.964	57.948	3.163	192.689	9.063	10.488	0.558	34.145	1.071		195d	10.86	17.5	58.18	3.17	10.31		10.31	3.17	58.18	17.5	10.86
	209d	0.474	0.007	0.521	0.041	0.7	0.055	0.363	0.006	0.238	0.011		209d	27.555	0.432	44.267	2.685	189.275	2.968	9.161	0.384	34.962	2.741		209d	9.03	14.5	62.01	3	11.46		11.46	3	62.01	14.5	9.03
K	Content	g/kg											Accumulation	g/plant											Distribution rate(%)											Distribution rate(%)
	Time	Leaf	sd	Stem	sd	Rhizome	sd	Fiber	sd	Tuber	sd		Time	Leaf	sd	Stem	sd	Rhizome	sd	Fiber	sd	Tuber	sd		Time	Leaf	Stem	Rhizome	Fiber	Tuber		Tuber	Fiber	Rhizome	Stem	Leaf
	55d	3.182	0.095	6.432	0.403	4.267	0.268	2.986	0.047				55d	76.685	1.202	99.978	1.568	33.291	2.088	7.61	0.119				55d	35.24	45.92	15.34	3.51				3.51	15.34	45.92	35.24
	69d	2.875	0.077	5.187	0.325	3.31	0.104	2.357	0.148				69d	102.008	1.599	110.009	2.174	33.95	1.065	11.445	0.325				69d	39.64	42.72	13.21	4.44				4.44	13.21	42.72	39.64
	83d	2.845	0.089	4.344	0.136	3.656	0.287	2.598	0.081				83d	227.399	3.565	178.306	3.387	86.259	4.057	32.866	1.546				83d	43.32	33.96	16.45	6.27				6.27	16.45	33.96	43.32
	111d	2.847	0.089	3.887	0.183	2.173	0.034	4.247	0.133	3.925	0.362		111d	290.4	4.553	201.027	5.304	152.509	6.565	70.874	3.334	17.077	0.803		111d	39.74	27.43	20.86	9.64	2.34		2.34	9.64	20.86	27.43	39.74
	125d	2.669	0.167	2.563	0.121	2.276	0.178	3.819	0.06	3.604	0.257		125d	281.805	4.418	277.046	6.344	308.189	9.16	92.238	5.785	88.304	3.747		125d	26.9	26.45	29.42	8.81	8.43		8.43	8.81	29.42	26.45	26.9
	139d	3.405	0.267	3.242	0.102	2.109	0.165	5.17	0.381	3.07	0.241		139d	277.403	17.397	420.477	10.963	431.613	13.735	169.185	13.263	193.716	7.149		139d	18.57	28.16	28.94	11.35	12.99		12.99	11.35	28.94	28.16	18.57
	167d	2.121	0.066	2.154	0.104	1.823	0.102	4.198	0.197	2.125	0.167		167d	155.121	12.161	259.374	6.267	453.106	14.104	114.67	7.798	239.736	7.035		167d	12.7	21.22	37.08	9.39	19.62		19.62	9.39	37.08	21.22	12.7
	195d	1.854	0.145	2.044	0.128	1.538	0.096	3.674	0.258	1.721	0.136		195d	120.798	3.788	196.37	3.683	417.422	12.179	92.591	5.807	241.397	7.57		195d	11.31	18.38	39.06	8.67	22.59		22.59	8.67	39.06	18.38	11.31
	209d	1.835	0.086	2.023	0.063	1.495	0.023	3.32	0.26	1.651	0.129		209d	106.563	6.683	171.903	3.086	404.147	11.673	83.8	4.573	242.685	7.22		209d	10.57	17.03	40.04	8.3	24.07		24.07	8.3	40.04	17.03	10.57
Ca	Content	g/kg											Accumulation	g/plant											Distribution rate(%)											Distribution rate(%)
	Time	Leaf	sd	Stem	sd	Rhizome	sd	Fiber	sd	Tuber	sd		Time	Leaf	sd	Stem	sd	Rhizome	sd	Fiber	sd	Tuber	sd		Time	Leaf	Stem	Rhizome	Fiber	Tuber		Tuber	Fiber	Rhizome	Stem	Leaf
	55d	6.433	0.121	1.827	0.086	1.651	0.052	4.638	0.276				55d	15.499	1.188	2.837	0.178	1.288	0.048	1.182	0.037				55d	74.48	13.63	6.2	5.69				5.69	6.2	13.63	74.48
	69d	6.572	0.103	1.993	0.031	1.861	0.058	4.276	0.268				69d	23.391	1.834	4.229	0.199	1.908	0.087	2.071	0.097				69d	73.96	13.4	6.07	6.58				6.58	6.07	13.4	73.96
	83d	6.446	0.404	2.822	0.221	1.987	0.125	3.44	0.162				83d	51.568	4.736	11.584	0.368	4.689	0.294	4.353	0.137				83d	71.4	16.06	6.51	6.04				6.04	6.51	16.06	71.4
	111d	6.141	0.106	6.055	0.475	0.928	0.058	4.9	0.307	0.333	0.022		111d	62.628	4.921	31.327	0.982	6.509	0.51	8.163	0.362	0.145	0.005		111d	57.65	28.75	5.99	7.48	0.14		0.14	7.48	5.99	28.75	57.65
	125d	13.097	0.821	8.243	0.646	0.897	0.056	5.284	0.414	0.38	0.03		125d	138.293	8.673	89.124	4.192	12.148	0.571	12.757	0.4	0.928	0.037		125d	54.62	35.18	4.8	5.04	0.37		0.37	5.04	4.8	35.18	54.62
	139d	13.89	0.937	7.4	0.464	0.515	0.024	4.444	0.319	0.395	0.012		139d	113.121	7.482	95.88	4.013	10.532	0.495	14.544	0.456	2.496	0.157		139d	47.77	40.57	4.46	6.16	1.06		1.06	6.16	4.46	40.57	47.77
	167d	20.123	0.631	6.737	0.422	0.436	0.021	4.236	0.332	0.08	0.005		167d	147.2	7.308	80.967	4.027	10.815	0.509	11.578	0.545	0.907	0.043		167d	58.54	32.19	4.3	4.61	0.36		0.36	4.61	4.3	32.19	58.54
	195d	25.738	2.018	16.523	0.259	0.153	0.002	3.247	0.126	0.059	0.003		195d	167.608	10.512	158.742	5.956	4.147	0.13	8.183	0.385	0.828	0.026		195d	49.39	46.74	1.23	2.41	0.25		0.25	2.41	1.23	46.74	49.39
	209d	27.503	1.294	18.288	0.86	0.061	0.004	2.555	0.04	0.045	0.003		209d	159.749	8.947	155.451	4.875	1.646	0.077	6.451	0.202	0.665	0.018		209d	49.32	47.98	0.51	1.99	0.21		0.21	1.99	0.51	47.98	49.32
Mg	Content	g/kg											Accumulation	g/plant											Distribution rate(%)											Distribution rate(%)
	Time	Leaf	sd	Stem	sd	Rhizome	sd	Fiber	sd	Tuber	sd		Time	Leaf	sd	Stem	sd	Rhizome	sd	Fiber	sd	Tuber	sd		Time	Leaf	Stem	Rhizome	Fiber	Tuber		Tuber	Fiber	Rhizome	Stem	Leaf
	55d	3.45	0.108	3.7	0.116	6.451	0.303	8.865	0.278				55d	8.314	0.53	5.751	0.361	5.031	0.079	2.26	0.035				55d	8.91	26.92	23.57	10.6				10.6	23.57	26.92	8.91
	69d	3.314	0.052	3.841	0.181	6.23	0.391	8.376	0.131				69d	11.797	0.74	8.148	0.383	6.387	0.1	4.058	0.318				69d	38.75	26.81	21.08	13.37				13.37	21.08	26.81	38.75
	83d	3.17	0.099	5.862	0.184	4.396	0.345	6.189	0.106				83d	25.361	1.988	24.065	0.755	10.374	0.813	7.832	0.645				83d	37.48	35.59	15.36	11.59				11.59	15.36	35.59	37.48
	111d	1.667	0.021	8.698	0.546	3.285	0.206	5.782	0.272	1.725	0.135		111d	17.004	0.933	44.995	2.116	23.052	1.847	9.622	0.753	0.751	0.012		111d	17.88	47.09	24.22	10.04	0.79		0.79	10.04	24.22	47.09	17.88
	125d	3.578	0.224	8.349	0.431	2.932	0.23	4.078	0.32	1.632	0.047		125d	37.774	2.961	90.218	4.244	39.7	3.112	9.848	0.772	3.991	0.147		125d	20.82	49.69	21.88	5.43	2.2		2.2	5.43	21.88	49.69	20.82
	139d	4.2	0.066	7.373	0.231	2.78	0.218	4.231	0.066	1.595	0.075		139d	34.29	2.762	95.539	4.527	56.89	3.568	13.846	1.434	10.063	0.316		139d	16.25	45.37	27.03	6.58	4.79		4.79	6.58	27.03	45.37	16.25
	167d	5.754	0.09	6.049	0.095	2.289	0.072	3.747	0.176	1.646	0.052		167d	42.105	3.32	72.701	3.14	56.965	3.559	10.237	0.802	18.567	0.495		167d	20.99	36.25	28.4	5.11	9.26		9.26	5.11	28.4	36.25	20.99
	195d	2.245	0.014	3.503	0.165	1.902	0.119	2.061	0.129	0.92	0.058		195d	14.621	0.917	33.616	1.054	51.612	2.428	5.196	0.363	12.904	0.405		195d	12.4	28.5	43.76	4.41	10.94		10.94	4.41	43.76	28.5	12.4
	209d	1.715	0.067	3.152	0.049	1.786	0.084	1.846	0.058	0.885	0.042		209d	9.984	0.783	26.775	1.679	48.276	2.785	4.661	0.365	13.007	0.404		209d	9.73	26.07	47.01	4.54	12.67		12.67	4.54	47.01	26.07	9.73
Fe	Content	mg/kg											Accumulation	mg/plant											Distribution rate(%)											Distribution rate(%)
	Time	Leaf	sd	Stem	sd	Rhizome	sd	Fiber	sd	Tuber	sd		Time	Leaf	sd	Stem	sd	Rhizome	sd	Fiber	sd	Tuber	sd		Time	Leaf	Stem	Rhizome	Fiber	Tuber		Tuber	Fiber	Rhizome	Stem	Leaf
	55d	177.853	13.943	98.816	6.197	258.965	8.121	561.469	8.803				55d	0.429	0.013	0.154	0.002	0.202	0.016	0.143	0.004				55d	46.21	16.56	21.79	15.44				15.44	21.79	16.56	46.21
	69d	163.497	12.817	103.024	6.461	239.86	15.043	524.846	32.916				69d	0.582	0.027	0.219	0.01	0.246	0.017	0.255	0.02				69d	44.66	16.8	18.97	19.59				19.59	18.97	16.8	44.66
	83d	62.684	3.931	125.127	5.886	180.953	5.674	478.341	29.999				83d	0.501	0.021	0.513	0.008	0.427	0.027	0.606	0.047				83d	24.48	25.08	20.87	29.58				29.58	20.87	25.08	24.48
	111d	50.228	0.788	144.645	2.268	20.463	0.963	914.394	43.01	48.255	2.27		111d	0.513	0.032	0.747	0.023	0.144	0.007	1.523	0.072	0.021	0.001		111d	17.5	25.43	4.91	51.45	0.72		0.72	51.45	4.91	25.43	17.5
	125d	140.004	6.585	114.703	8.992	4.419	0.069	682.153	53.477	53.413	1.675		125d	1.478	0.674	1.241	0.039	0.06	0.003	1.647	0.087	0.131	0.006		125d	32.44	27.2	1.32	36.18	2.88		2.88	36.18	1.32	27.2	32.44
	139d	195.861	14.233	90.223	5.658	3.207	0.201	657.519	20.618	197.568	5.343		139d	1.595	0.726	1.169	0.092	0.066	0.003	2.152	0.101	1.247	0.078		139d	25.59	18.77	1.06	34.56	20.04		20.04	34.56	1.06	18.77	25.59
	167d	633.004	29.774	54.624	3.426	2.584	0.203	554.844	34.797	108.053	3.236		167d	4.63	0.145	0.656	0.031	0.065	0.004	1.517	0.071	1.22	0.057		167d	57.27	8.11	0.8	18.76	15.08		15.08	18.76	0.8	8.11	57.27
	195d	1041.54	21.325	797.445	62.515	1.247	0.059	222.843	10.482	9.473	0.446		195d	6.78	0.216	7.661	0.601	0.034	0.002	0.562	0.009	0.133	0.008		195d	44.71	50.49	0.23	3.7	0.88		0.88	3.7	0.23	50.49	44.71
	209d	1121.86	17.59	830.264	26.035	0.633	0.03	196.693	3.084	7.523	0.354		209d	6.516	0.202	7.058	0.111	0.018	0.001	0.497	0.031	0.111	0.003		209d	45.91	49.7	0.12	3.5	0.78		0.78	3.5	0.12	49.7	45.91
Mn	Content	mg/kg											Accumulation	mg/plant											Distribution rate(%)											Distribution rate(%)
	Time	Leaf	sd	Stem	sd	Rhizome	sd	Fiber	sd	Tuber	sd		Time	Leaf	sd	Stem	sd	Rhizome	sd	Fiber	sd	Tuber	sd		Time	Leaf	Stem	Rhizome	Fiber	Tuber		Tuber	Fiber	Rhizome	Stem	Leaf
	55d	25.23	1.187	14.316	0.898	27.264	2.137	45.485	1.426				55d	0.061	0.005	0.023	0.001	0.022	0.001	0.012	0.001				55d	52.44	19.19	18.37	10.02				10.02	18.37	19.19	52.44
	69d	23.556	1.477	13.022	0.817	25.676	1.453	41.772	1.293				69d	0.084	0.004	0.028	0.001	0.027	0.002	0.02	0.002				69d	52.98	17.48	16.71	12.84				12.84	16.71	17.48	52.98
	83d	19.075	0.299	5.448	0.085	22.523	0.706	39.683	2.489				83d	0.153	0.005	0.022	0.001	0.053	0.003	0.05	0.004				83d	54.8	8.04	19.11	18.06				18.06	19.11	8.04	54.8
	111d	13.326	0.627	9.74	0.305	12.765	0.801	31.416	1.478	5.397	0.423		111d	0.136	0.005	0.051	0.003	0.09	0.003	0.053	0.004	0.002	0		111d	41.16	15.22	27.12	15.8	0.71		0.71	15.8	27.12	15.22	41.16
	125d	27.936	2.19	8.431	0.264	11.386	0.179	28.48	0.447	1.809	0.113		125d	0.295	0.009	0.091	0.007	0.154	0.005	0.069	0.006	0.005	0		125d	48.08	14.85	25.14	11.22	0.72		0.72	11.22	25.14	14.85	48.08
	139d	30.294	0.475	7.66	0.108	6.66	0.522	31.745	1.493	1.446	0.113		139d	0.247	0.011	0.1	0.008	0.136	0.004	0.104	0.007	0.009	0.001		139d	41.41	16.68	22.9	17.48	1.54		1.54	17.48	22.9	16.68	41.41
	167d	31.986	0.521	7.792	0.122	4.506	0.212	29.586	2.319	1.417	0.092		167d	0.234	0.011	0.094	0.007	0.112	0.002	0.081	0.006	0.016	0.001		167d	43.65	17.46	20.82	15.1	2.99		2.99	15.1	20.82	17.46	43.65
	195d	47.728	2.993	26.515	0.416	2.954	0.139	15.604	0.832	0.362	0.006		195d	0.311	0.015	0.255	0.008	0.08	0.001	0.04	0.002	0.005	0		195d	45.05	36.9	11.62	5.7	0.73		0.73	5.7	11.62	36.9	45.05
	209d	50.312	2.366	29.356	1.381	1.067	0.017	13.39	0.84	0.248	0.012		209d	0.293	0.009	0.25	0.008	0.029	0.002	0.034	0.002	0.004	0		209d	48.08	41.03	4.74	5.56	0.6		0.6	5.56	4.74	41.03	48.08
Cu	Content	mg/kg											Accumulation	mg/plant											Distribution rate(%)											Distribution rate(%)
	Time	Leaf	sd	Stem	sd	Rhizome	sd	Fiber	sd	Tuber	sd		Time	Leaf	sd	Stem	sd	Rhizome	sd	Fiber	sd	Tuber	sd		Time	Leaf	Stem	Rhizome	Fiber	Tuber		Tuber	Fiber	Rhizome	Stem	Leaf
	55d	1.29	0.02	1.859	0.146	1.649	0.084	13.47	0.845				55d	0.003	0	0.003	0	0.001	0	0.004	0				55d	28.97	27.04	12.01	31.99				31.99	12.01	27.04	28.97
	69d	1.935	0.061	2.03	0.159	3.434	0.269	14.899	1.168				69d	0.007	0	0.005	0	0.004	0	0.007	0				69d	31.34	19.63	16.09	32.95				32.95	16.09	19.63	31.34
	83d	2.576	0.162	2.691	0.042	10.383	0.841	19.566	1.227				83d	0.021	0.001	0.011	0	0.025	0.001	0.025	0.002				83d	25.46	13.65	30.31	30.6				30.6	30.31	13.65	25.46
	111d	3.862	0.303	1.938	0.091	4.883	0.118	14.783	0.695	1.795	0.084		111d	0.039	0.001	0.01	0	0.034	0.002	0.025	0.001	0.001	0		111d	36.17	9.17	31.46	22.49	0.72		0.72	22.49	31.46	9.17	36.17
	125d	2.907	0.091	2.105	0.132	4.109	0.129	11.989	0.188	2.202	0.096		125d	0.031	0.001	0.023	0.001	0.056	0.002	0.029	0.002	0.006	0		125d	21.41	15.87	38.79	20.19	3.77		3.77	20.19	38.79	15.87	21.41
	139d	2.903	0.228	2.566	0.08	4.034	0.19	10.164	0.159	3.229	0.138		139d	0.024	0.001	0.033	0.003	0.083	0.003	0.034	0.002	0.021	0.001		139d	12.24	17.22	42.76	17.23	10.56		10.56	17.23	42.76	17.22	12.24
	167d	6.236	0.254	3.877	0.122	3.726	0.117	12.692	0.995	2.493	0.117		167d	0.046	0.002	0.047	0.005	0.093	0.003	0.035	0.002	0.028	0.001		167d	18.48	18.8	37.37	14.01	11.36		11.36	14.01	37.37	18.8	18.48
	195d	5.005	0.078	7.738	0.121	3.394	0.266	7.152	0.449	1.685	0.079		195d	0.033	0.002	0.074	0.006	0.092	0.004	0.018	0	0.024	0.001		195d	13.55	30.88	38.27	7.49	9.82		9.82	7.49	38.27	30.88	13.55
	209d	4.697	0.074	8.671	0.544	3.174	0.199	6.405	0.502	1.548	0.049		209d	0.028	0.002	0.074	0.006	0.086	0.004	0.016	0	0.023	0.001		209d	12.11	32.64	38	7.17	10.09		10.09	7.17	38	32.64	12.11
Zn	Content	mg/kg											Accumulation	mg/plant											Distribution rate(%)											Distribution rate(%)
	Time	Leaf	sd	Stem	sd	Rhizome	sd	Fiber	sd	Tuber	sd		Time	Leaf	sd	Stem	sd	Rhizome	sd	Fiber	sd	Tuber	sd		Time	Leaf	Stem	Rhizome	Fiber	Tuber		Tuber	Fiber	Rhizome	Stem	Leaf
	55d	8.133	0.526	25.65	2.011	42.216	3.309	26.578	2.084				55d	0.02	0.001	0.04	0.001	0.033	0.001	0.007	0				55d	19.76	40.18	33.22	6.85				6.85	33.22	40.18	19.76
	69d	8.943	0.647	23.913	0.375	39.457	2.245	29.144	1.876				69d	0.032	0.001	0.051	0.001	0.041	0.001	0.015	0				69d	23.18	36.97	29.56	10.31				10.31	29.56	36.97	23.18
	83d	10.132	0.794	17.738	0.556	36.167	2.268	32.919	2.065				83d	0.081	0.005	0.073	0.003	0.085	0.003	0.042	0.002				83d	28.83	25.92	30.41	14.85				14.85	30.41	25.92	28.83
	111d	6.517	0.409	24.233	0.76	25.591	1.204	24.889	0.39	12.23	0.575		111d	0.067	0.001	0.126	0.006	0.18	0.006	0.042	0.002	0.006	0		111d	15.93	29.94	43	9.88	1.27		1.27	9.88	43	29.94	15.93
	125d	12.029	0.754	35.632	1.676	24.282	1.142	27.396	1.289	9.984	0.313		125d	0.127	0.006	0.386	0.028	0.329	0.021	0.067	0.002	0.025	0.001		125d	13.64	41.34	35.31	7.1	2.63		2.63	7.1	35.31	41.34	13.64
	139d	16.541	1.037	27.279	1.021	16.638	1.287	36.336	1.709	7.306	0.227		139d	0.135	0.006	0.354	0.022	0.341	0.027	0.119	0.004	0.046	0.003		139d	13.55	35.57	34.27	11.97	4.64		4.64	11.97	34.27	35.57	13.55
	167d	19.97	1.252	18.945	0.623	15.634	1.226	34.661	2.717	2.348	0.184		167d	0.147	0.007	0.228	0.018	0.389	0.032	0.095	0.003	0.027	0.002		167d	16.56	25.77	43.97	10.71	3		3	10.71	43.97	25.77	16.56
	195d	30.351	2.379	51.054	1.601	14.501	0.455	20.317	0.637	1.072	0.084		195d	0.198	0.008	0.491	0.028	0.394	0.036	0.051	0.003	0.015	0		195d	17.23	42.72	34.29	4.46	1.31		1.31	4.46	34.29	42.72	17.23
	209d	35.022	1.647	57.844	0.907	13.217	0.207	17.299	1.085	0.638	0.04		209d	0.204	0.009	0.492	0.031	0.357	0.027	0.044	0.002	0.01	0		209d	18.43	44.46	32.31	3.96	0.85		0.85	3.96	32.31	44.46	18.43
